# Supplementary material
Source: HighWire-hosted journal article supplement (https://openres.ersjournals.com/content/6/4/00391-2020)
Supplement: inline-supplementary-material-1 [file inline-supplementary-material-1.pdf]

**Online supplement**

**Oscillometry and Computed Tomography Findings in Patients with Idiopathic Pulmonary**

**Fibrosis**

Yuji Yamamoto\*, M.D., Keisuke Miki, M.D., Ph.D., Kazuyuki Tsujino, M.D., Ph.D., Tomoki

Kuge, M.D., Fukuko Okabe, M.D., Takahiro Kawasaki, M.D., Takanori Matsuki, M.D.,

Hiroyuki Kagawa, M.D., Mari Miki, M.D., Ph.D., Hiroshi Kida, M.D., Ph.D.

Department of Respiratory Medicine, National Hospital Organization Osaka Toneyama Medical  
Center, Toyonaka, Japan

**\*Corresponding author:** Yuji Yamamoto, M.D., Department of Respiratory Medicine, National  
Hospital Organization Osaka Toneyama Medical Center, Address: 5-1-1 Toneyama, Toyonaka,  
Osaka, 560-8552, Japan. Phone: +81-6-6853-2001, Fax: +81-6-6853-3127, E-mail:  
[cyyamamoto1110@gmail.com](mailto:cyyamamoto1110@gmail.com)

**Supplementary table 1.** Definition of high-resolution computed tomography findings

| HRCT finding             | Definition                                                                                                                       |
|--------------------------|----------------------------------------------------------------------------------------------------------------------------------|
| Airspace consolidation   | Homogeneous increase in pulmonary parenchymal attenuation that obscured the underlying vessels                                   |
| Honeycombing             | Clustered cystic airspaces from several mm to 1 cm in size with well-defined and thick walls were seen in the subpleural regions |
| Architectural distortion | Abnormal displacement of bronchi, pulmonary vessels, interlobar fissures, or interlobular septa                                  |
| Traction bronchiectasis  | Irregular bronchial dilatation within or around areas with parenchymal abnormality                                               |

HRCT, high-resolution computed tomography.

**Supplementary table 2.** High-resolution computed tomography scores

| Score                    | 0      | 1                                                                     | 2                                                                      | 3                                                                               | 4                                               |
|--------------------------|--------|-----------------------------------------------------------------------|------------------------------------------------------------------------|---------------------------------------------------------------------------------|-------------------------------------------------|
| Architectural distortion | Absent | Present                                                               |                                                                        |                                                                                 |                                                 |
| Traction bronchiectasis  | Absent | Bronchial dilatation involving bronchi distal to the fifth generation | Bronchial dilatation involving bronchi distal to the fourth generation | Bronchial dilatation involving bronchi proximal to the third generation bronchi |                                                 |
| Interstitial fibrosis    | Absent | Ground-glass attenuation without reticulation                         | Ground-glass and fine reticular opacity                                | Reticular opacity and microcysts < 3 mm                                         | Coarse reticular opacity and large cysts > 3 mm |

**Supplementary table 3.** Results of multivariate analyses assessing interactions between treatment for idiopathic pulmonary fibrosis and oscillometric parameters (n = 80)

| Parameter | Pirfenidone |         | Inhaled<br>N-acetylcysteine |         | Nintedanib  |         | Oral<br>corticosteroids |         |
|-----------|-------------|---------|-----------------------------|---------|-------------|---------|-------------------------|---------|
|           | std $\beta$ | p value | std $\beta$                 | p value | std $\beta$ | p value | std $\beta$             | p value |
|           | R5          | -0.111  | 0.350                       | 0.137   | 0.246       | -0.073  | 0.535                   | -0.103  |
| R20       | -0.114      | 0.331   | 0.136                       | 0.245   | -0.101      | 0.385   | -0.157                  | 0.171   |
| R5-R20    | -0.075      | 0.531   | 0.104                       | 0.384   | 0.005       | 0.968   | 0.036                   | 0.760   |
| X5        | -0.040      | 0.742   | -0.076                      | 0.524   | 0.019       | 0.876   | 0.010                   | 0.935   |
| Fres      | 0.139       | 0.247   | 0.024                       | 0.841   | 0.038       | 0.745   | 0.091                   | 0.435   |
| ALX       | 0.075       | 0.531   | 0.033                       | 0.783   | -0.035      | 0.771   | -0.023                  | 0.843   |

ALX, low-frequency reactance area; Fres, resonant frequency; R5 and R20, respiratory system resistance at 5 and 20Hz, respectively; std  $\beta$ , standardized partial regression coefficient; X5, respiratory system reactance at 5Hz.

**Supplementary table 4.** Results of multivariate analysis assessing interactions between forced

expiration volume in 1s/forced vital capacity and oscillometric parameters (n = 80)

| Parameter | std $\beta$   | p value       |
|-----------|---------------|---------------|
| R5        | 0.198         | 0.324         |
| R20       | indeterminate | indeterminate |
| R5-R20    | -0.259        | 0.229         |
| X5        | -0.246        | 0.598         |
| Fres      | 0.533         | 0.021         |
| ALX       | -0.470        | 0.369         |

ALX, low-frequency reactance area; Fres, resonant frequency; R5 and R20, respiratory system

resistance at 5 and 20Hz, respectively; std  $\beta$ , standardized partial regression coefficient; X5,

respiratory system reactance at 5Hz.
